# Supplementary material
Source: PubMed Central journal article supplement (PMC3346110)
Supplement: supp_M111.338665_jbc.M111.338665-1.pdf [file supp_M111.338665_jbc.M111.338665-1.pdf]

Table S1. Primer sequence

| Name   | Sequence (5'-3')                                                                                                        |
|--------|-------------------------------------------------------------------------------------------------------------------------|
| PTM181 | GAGAAACAAGCAGGCCCTGGTAGCATAGTTTGGTCCCTAATAATTTAGTCAAGATTGACTGAGAGTGCAC                                                  |
| PTM182 | CATTCAAAATGAAAAGTCAGGACCCCTTTTCAAAAAGGATCGCAATATACTGTGCGGTATTTACACCCG                                                   |
| PTM183 | GATCGCTCAAATCCTTCTTGGTCGTTATTTTTGAAGAAGAAGGAAAAGCAAAGCCAGCAGATTGACTGAGAGTGCAC                                           |
| PTM184 | GATAATACTATATACAGCAAAAATAAATGCTAACTTTACATATGATTGCTTCTGTGCGGTATTTACACCCG                                                 |
| PTM243 | CTGTTTGTGTTTAACTTGAATTACAATAACAATAATACCAGTTTATAGATTGACTGAGAGTGCAC                                                       |
| PTM245 | GTATTAGTATTACATGTTGAATAATGCACATCTGTGCTAAAATATATACTCTGTGCGGTATTTACACCCG                                                  |
| PTM272 | CAATTAATACAAAAAAACCAACTGCAAGAACTTCAGCATCGTCAGATTGACTGAGAGTGCAC                                                          |
| PTM273 | CGGAGAGTATGTAATGTGTAGTTATGACTTAGATATGTAACCTTAACTGTGCGGTATTTACACCCG                                                      |
| PTM316 | CACGTAGGCATATATATGTAATTCGGACGGGAAAGCTGGCAGTCTACTATAGATTGACTGAGAGTGCAC                                                   |
| PTM317 | CGATGCTATGTAAATGCAATATGACAGAAAAGTGACAGGAGTAGGTATTCCTGTGCGGTATTTACACCCG                                                  |
| PTM318 | AAACAAAAGGCACATACAGATTATCAGGTGGTGGGAGGTTATAAAATTCAGATTGACTGAGAGTGCAC                                                    |
| PTM319 | CTTGATAAATGAAATGCAAGGAAGTTCAGTTGATAATTATAAAGCAATAGCTGTGCGGTATTTACACCCG                                                  |
| PTM324 | GGGGCAAACCTGAAAGCGCGCATTCATTACATCGTCTCCTTACCTAGTCAGATTGACTGAGAGTGCAC                                                    |
| PTM325 | TATGTAATATAAAAAATAAAATGTTTTACTTTTTATTAAGTTGCCCTAAGTGTGCGGTATTTACACCCG                                                   |
| PTM337 | GTATCAATTTGGTAAAGAATCCTCGATTTCAGGAGCATCAACGACGAAGAGATTGACTGAGAGTGCAC                                                    |
| PTM338 | TTTTTTTTTTTCCATTTGGTAACCACTAAGTACAGCCAAITTTTCGGCGGCTGTGCGGTATTTACACCCG                                                  |
| PTM353 | GTATGTGGCCACGTAGTAAAAATACGAGAGAGAAAAGCCTACAGAGTTACGGATCCCCGGTTAATTA                                                     |
| PTM354 | GAGGCAGAGAAGATAGGAAAAAGATAGAACAATAAATTTGTACATAAATATGAATTCGAGCTCGTTAAAC                                                  |
| PTM361 | GAGATGAAAGAACCTTTGAGAGAGTCAATATAATACCTGTAGCCTTTTCTGAAAAGATTGACTGAGAGTGCAC                                               |
| PTM362 | GAGGCAGAGAAGATAGGAAAAAGATAGAACAATAAATTTGTACATAAATATCTGTGCGGTATTTACACCCG                                                 |
| PTM363 | CAAAGCAATATACGTTAGGAAAAAGACACGAACAGAGAAGACCATTTGAGATTGACTGAGAGTGCAC                                                     |
| PTM364 | CTTATTTTTAACCTGTATATTAACCTTTATTTTTATTTACATTAATCTACTGTGCGGTATTTACACCCG                                                   |
| PTM365 | AGGAGTTAGCATGGCCAAGTTGGATTAATCTGGATTTCACAGATGGTGATGAGCGGATCCCCGGTTAATTA                                                 |
| PTM366 | CTCAAAAATGTTGTTTTTTATGTAGACACTATTTCAAACCTATCTTTGTTAAAGAAATTCGAGCTCGTTAAAC                                               |
| PTM371 | CCCGGATCCGGAGGCCCTTGACATAATCTG                                                                                          |
| PTM372 | GGGCTCGAGGGTACTAGATTGTCTGGCTATAATC                                                                                      |
| PTM374 | CCCGGATCCGGTATTTTCATCACAAAAGGAGG                                                                                        |
| PTM375 | GGGCTCGAGACTTTCCATGATAATTTCTCCATTG                                                                                      |
| PTM376 | CCCGGATCCCAACAGCTTCGAAACACTGATCTGGAC                                                                                    |
| PTM377 | GGGCTCGAGGAGGAGTCGTGCAGTGAACAAGGC                                                                                       |
| PTM379 | CCCGGATCCCAGGTAAACATTGCATATAAATTC                                                                                       |
| PTM380 | GGGCTCGAGCTGTATAAAGTTATATAATAATATG                                                                                      |
| PTM454 | AAAGCGCCGCAATAATAGAGTTTTGGATGTGCC                                                                                       |
| PTM455 | GGGCTCGAGGATGGTTCAAACCAACGTTGACC                                                                                        |
| PTM460 | AAAGCGCCGCAATTTGCCAATCAATCTCTGGC                                                                                        |
| PTM461 | CCCGAATCTTTAATTCCTTCTCTTCCAC                                                                                            |
| PTM462 | AAAGCGCCGCTGCCCCATCTGTCCACTTAC                                                                                          |
| PTM469 | GGGCTCGAGATGACGGTATCTCTGTAGACG                                                                                          |
| PTM489 | GGGCTCGAGATGGACACATATTTCCGCAATG                                                                                         |
| PTM492 | TTTGAGCTCCACCTGACCAACAAGATTG                                                                                            |
| PTM685 | TTTTGAATTTCTCACACCTTCTCAAGCGTAAATGTCCTC                                                                                 |
| PTM690 | TTTTCTCGAGTTAATTCCTTCTCTTCCAC                                                                                           |
| PTM705 | TTTGAATTCAGAAATAGTCTTTAGCGATGCCG                                                                                        |
| PTM706 | TTTTGAATTCGACTACAAGACCATGACGGTGATTATAAAGATCATGACATCGACTACAAGGATGACGATGACAAGAATGAGTCTAAAAGTGGAGGGATGCTCC                 |
| PTM709 | GGGACTAGTGAAAACCTGTACTTTCAAGGCGACTACAAGACCATGACGGTGATTATAAAGATCATGACATCGACTACAAGGATGACGATGACAAGCTGGTTGGGCCAGGATCTCCCCGG |
| PTM712 | GGGACTAGTAGGAAGGGATGAAGTGTACCTTTTC                                                                                      |
| PTM740 | CCTCTTACCGAGCAAGIAGGCTAGCTTCTGTAAAGGGAITTTCCATCTAATAACAAGATTGACTGAGAGTGCAC                                              |
| PTM741 | CATCAGATTGCACTCTCGTTCTTTAAATATGTATGAGATTGATTCTATATAGCTGTGCGGTATTTACACCCG                                                |
| 571    | TGCTTAGAATGCTGTTTAAAGGGACACGTCG                                                                                         |
| 582    | TCCCCGGTCACTCGAGCGAGTACACCAATTC                                                                                         |
| 1729   | AGTATGTCTGGCTTCTGAGACGGCGGTAAGATATCCTTAAAGATTGCAAGATTGACTGAGAGTGCAC                                                     |
| 1730   | CAATTTCCGCTCGCCATGGTGAATCTTTAAAGATCTTTAAATGGGAACACTGTGCGGTATTTACACCCG                                                   |
| 1744   | AATAGATTTACAGACTAAGATAAATAATCGAGAATAATTAAGAGCATAAAGATTGACTGAGAGTGCAC                                                    |
| 1745   | AGGAATAAAGTAGTATGCAGTGCATCGGGATCAAGGAATTTGTATCTGTGCGGTATTTACACCCG                                                       |
